# Supplementary material for: Identification of three tumor antigens and immune subtypes for mRNA vaccine development in diffuse glioma
Source: PubMed Central journal article supplement (PMC8581422; doi:10.7150/thno.61677), 2021-10-03
Supplement: thnov11p9775s1.pdf [file thnov11p9775s1.pdf]

## Supplementary material

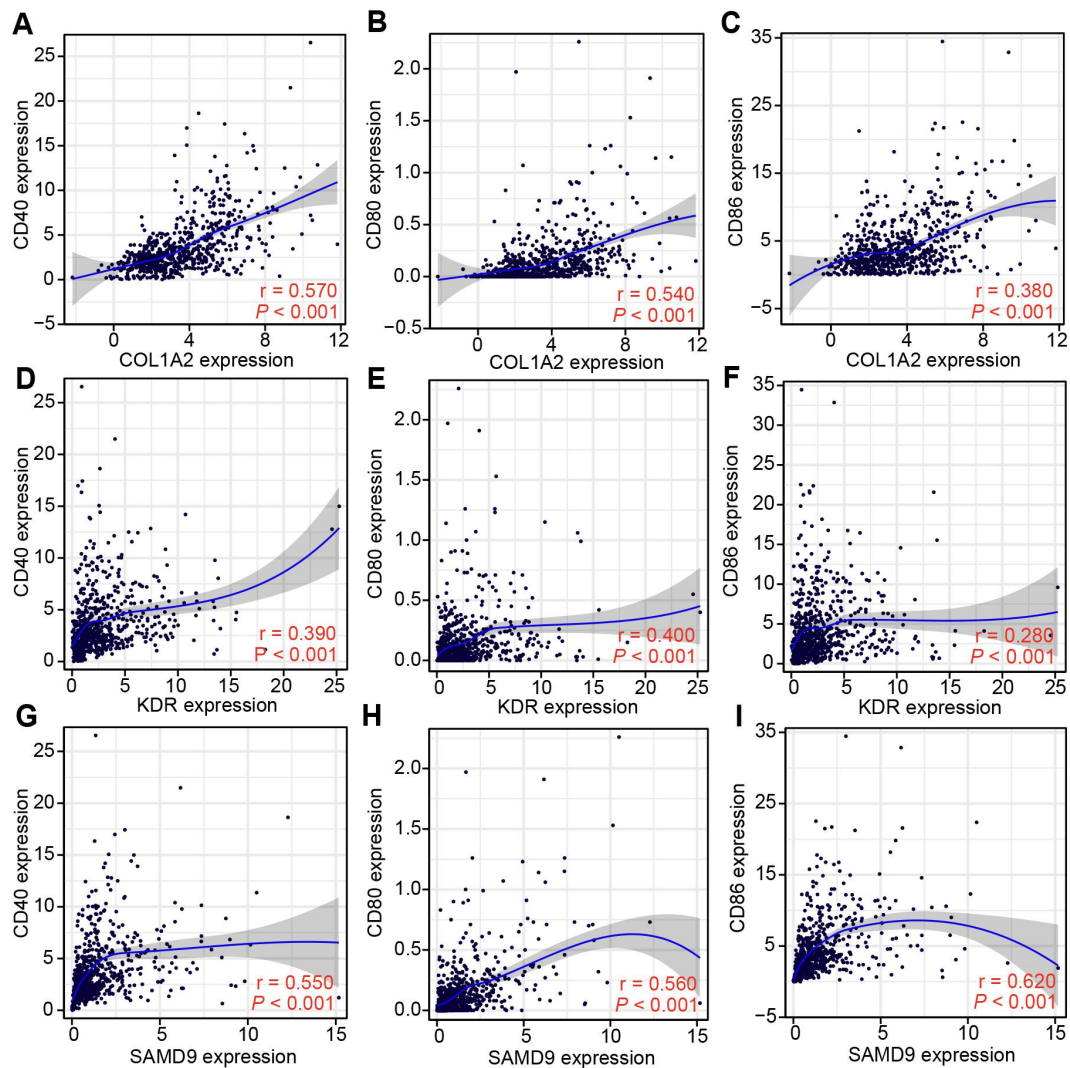

**Figure S1.** Correlation between the expression levels of three antigens and those of APC markers in the CGGA diffuse glioma. (A-C) Correlation between the expression levels of COL1A2 and those of CD40 (A), CD80 (B), and CD86 (C). (D-F) Correlation between the expression levels of KDR and those of CD40 (D), CD80 (E), and CD86 (F). (G-I) Correlation between the expression levels of SAMD9 and those of CD40 (G), CD80 (H), and CD86 (I). Correlations were determined by the Spearman' test, and  $P < 0.05$



boxplot with asterisks (ns represents no significance, \*  $P < 0.05$ , \*\*  $P < 0.01$ , \*\*\*  $P < 0.001$ ).

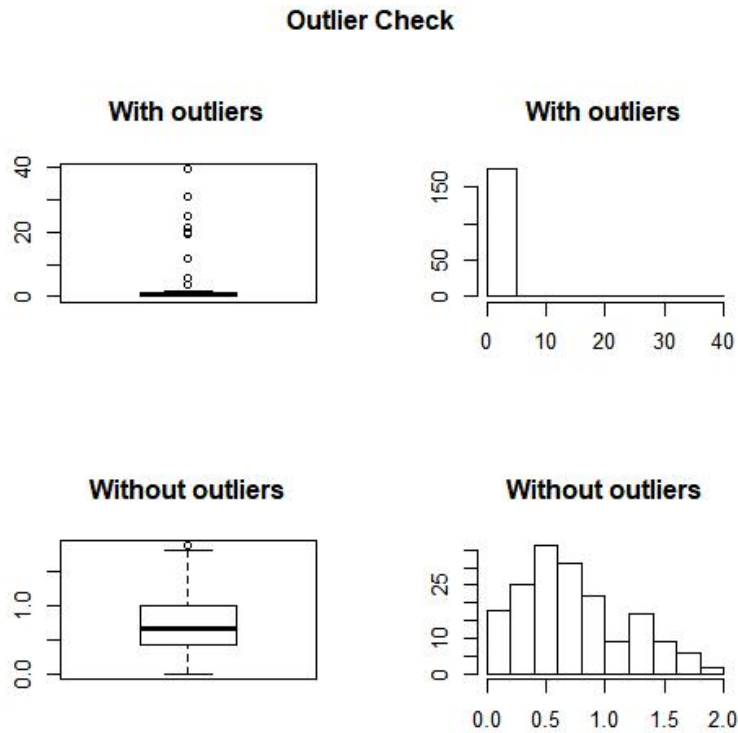

**Figure S3.** TMB distribution before and after excluding sample outliers.

### Outlier Check

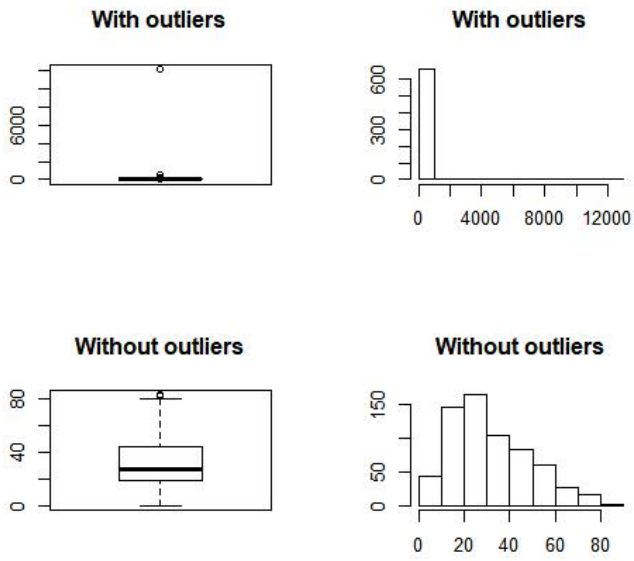

**Figure S4.** Mutation count distribution before and after excluding sample outliers.

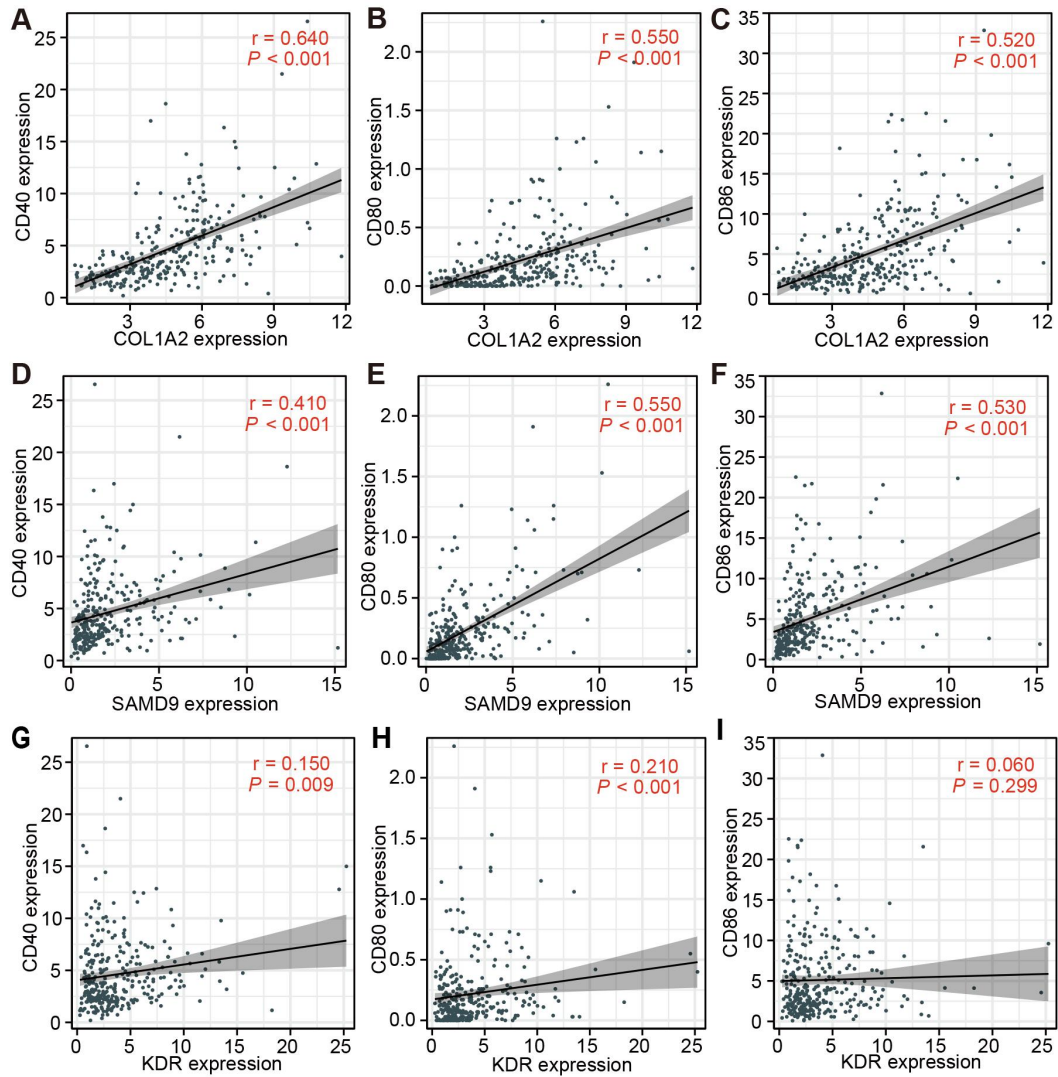

**Figure S5.** Correlation between the expression levels of three antigens and those of APC markers in diffuse glioma with subtype lms1 in the CCGA cohort. (A-C) Correlation between the expression levels of COL1A2 and those of CD40 (A), CD80 (B), and CD86 (C). (D-F) Correlation between the expression levels of SAMD9 and those of CD40 (D), CD80 (E), and CD86 (F). (G-I) Correlation between the expression levels of KDR and those of CD40 (G), CD80 (H), and CD86 (I). Correlations were determined by the Spearman rank test, and  $P < 0.05$  was considered

significant.
